# Supplementary material for: Outcomes of Pemetrexed-based chemotherapies in HER2-mutant lung cancers
Source: PubMed Central journal article supplement (PMC5869778; doi:10.1186/s12885-018-4277-x), 2018-03-27

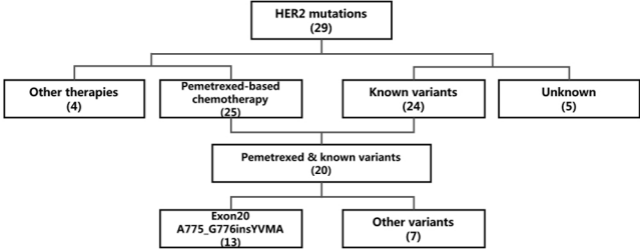

Supplement: 12885_2018_4277_MOESM1_ESM.pdf [file 12885_2018_4277_MOESM1_ESM.pdf]
